# Supplementary material for: Bacterial Communities of Three Saline Meromictic Lakes in Central Asia
Source: PLOS journal article supplement (doi:10.1371/journal.pone.0150847), 2016-03-02

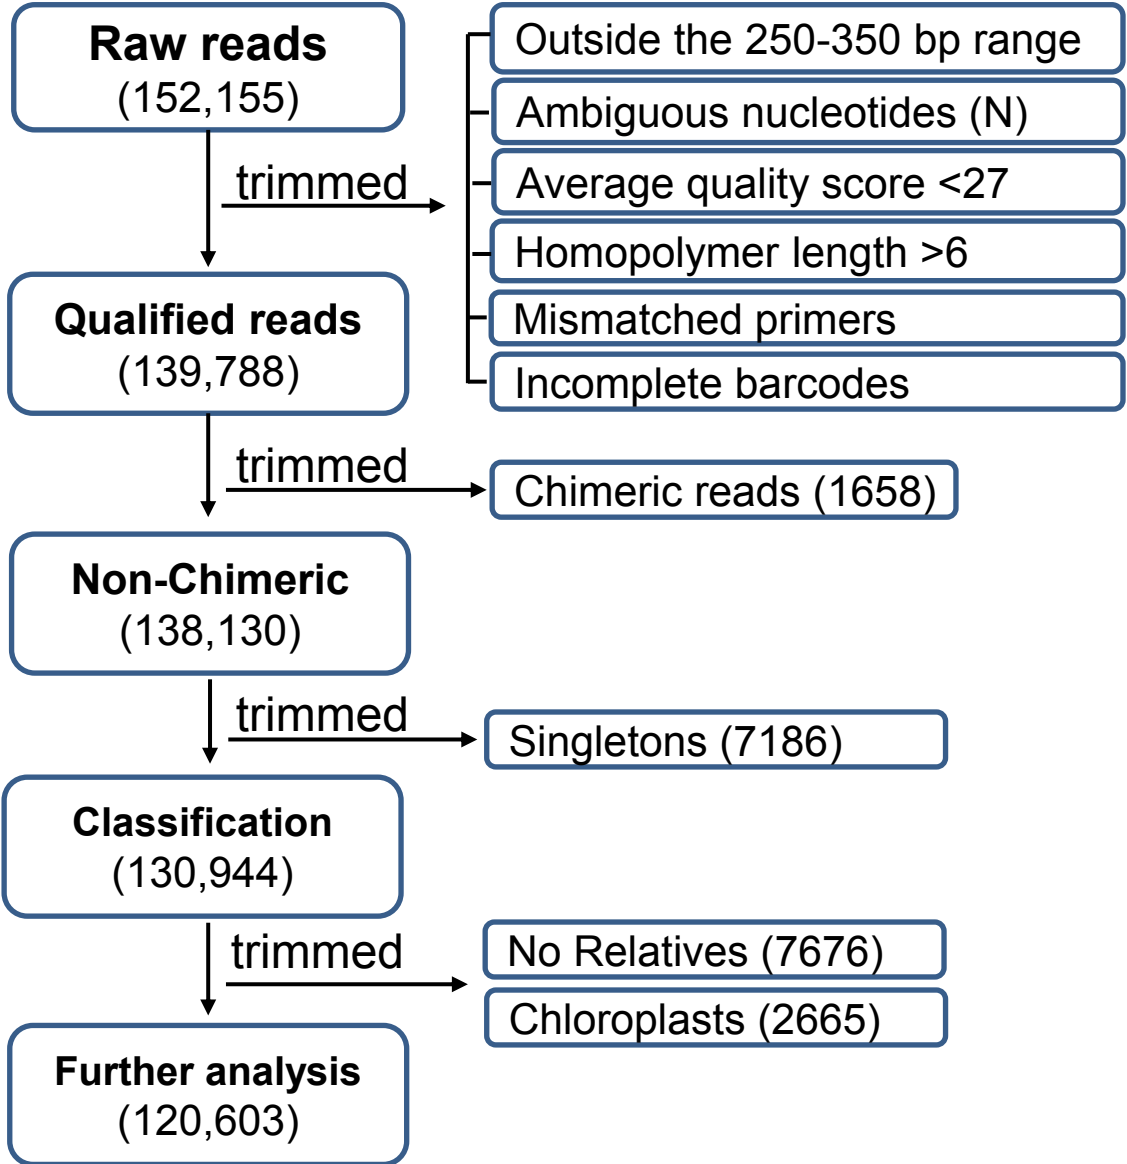

Supplement: S2 (10.1371/journal.pone.0150847.s002) [file journal.pone.0150847.s002]
